# Supplementary material for: Chitosan-Crosslinked Low Molecular Weight PEI-Conjugated Iron Oxide Nanoparticle for Safe and Effective DNA Delivery to Breast Cancer Cells
Source: MDPI journal article supplement (doi:10.3390/nano12040584), 2022-02-09
Supplement: s1 [file s1]

# Chitosan-Crosslinked Low Molecular Weight PEI-Conjugated Iron Oxide Nanoparticle for Safe and Effective DNA Delivery to Breast Cancer Cells

Guanyou Lin <sup>†</sup>, Jianxi Huang <sup>†</sup>, Mengyuan Zhang, Shanshan Chen and Miqin Zhang <sup>\*</sup>

Department of Materials Science and Engineering, University of Washington, Seattle, WA 98195, USA; linguany@uw.edu (G.L.); jianxi@uw.edu (J.H.); zhangm28@uw.edu (M.Z.); schen268@jh.edu (S.C.)

<sup>\*</sup> Correspondence: mzhang@uw.edu

<sup>†</sup> These authors contributed equally to this work.

The NP-Chi-xPEI-DNA complex was formed by mixing Chi-xPEI and DNA (pDsRed-MAX-N1 in 20mM HEPES buffer (pH 7.4) at Chi-xPEI:DNA wt/wt ratios of 40:1. Chi-xPEI-DNA solutions were incubated for at least 10 min with gentle rocking to allow formation of DNA complexes.

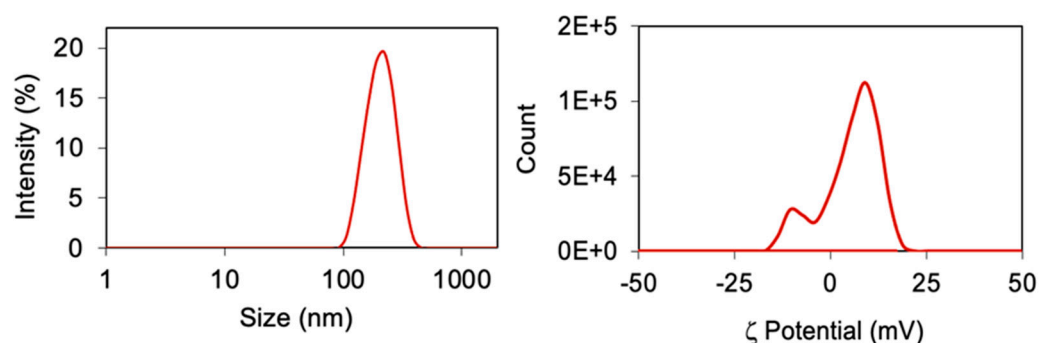

**Figure S1.** Hydrodynamic size and zeta potential distribution profiles of Chi-xPEI-DNA. The hydrodynamic size and zeta potential mean of Chi-xPEI-DNA are 223 nm and 18.7 mV respectively.

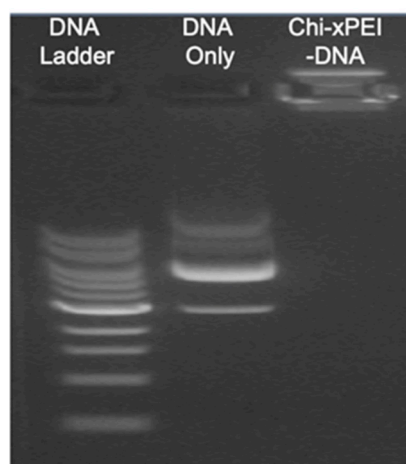

**Figure S2.** Gel electrophoresis image of Chi-xPEI-DNA. Although there wasn't free DNA band observed in the Chi-xPEI-DNA lane like that in the DNA ladder and the DNA only lanes, the free DNA signal is readily visible in the loading well.

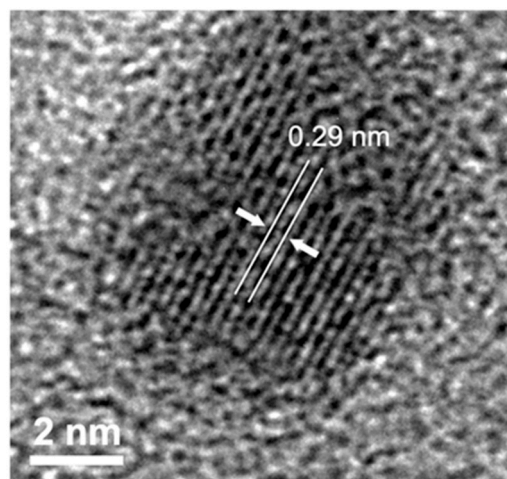

**Figure S3.** High resolution TEM micrograph of NP-Chi-xPEI-DNA. This image reveals the planar distance of 0.29 nm in NP crystal lattice, corresponding to the characteristic {220} planes of  $\text{Fe}_3\text{O}_4$  crystalline.

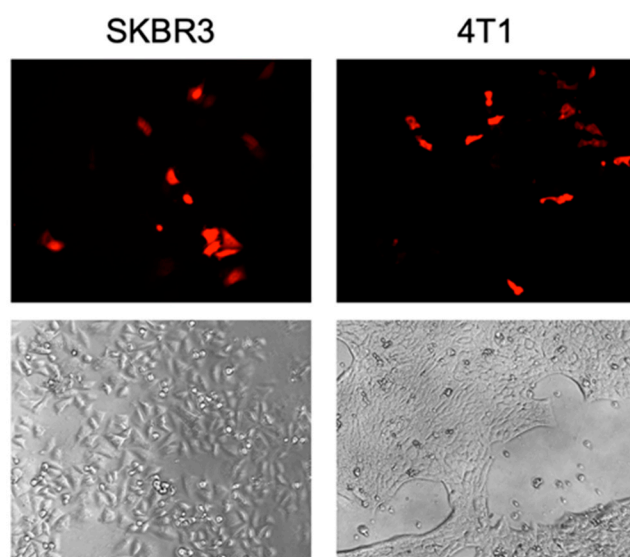

**Figure S4.** Fluorescence images of SKBR3 and 4T1 cells transfected with Chi-xPEI-DNA at DNA concentration of 2  $\mu\text{g/mL}$  for 48 hours. The bottom row is bright field images corresponding to the fluorescence images in the top row.
